# Supplementary material for: Utilization of Novel Perilla SSR Markers to Assess the Genetic Diversity of Native Perilla Germplasm Accessions Collected from South Korea
Source: MDPI journal article supplement (doi:10.3390/plants11212974), 2022-11-03
Supplement: s1 [file s1]

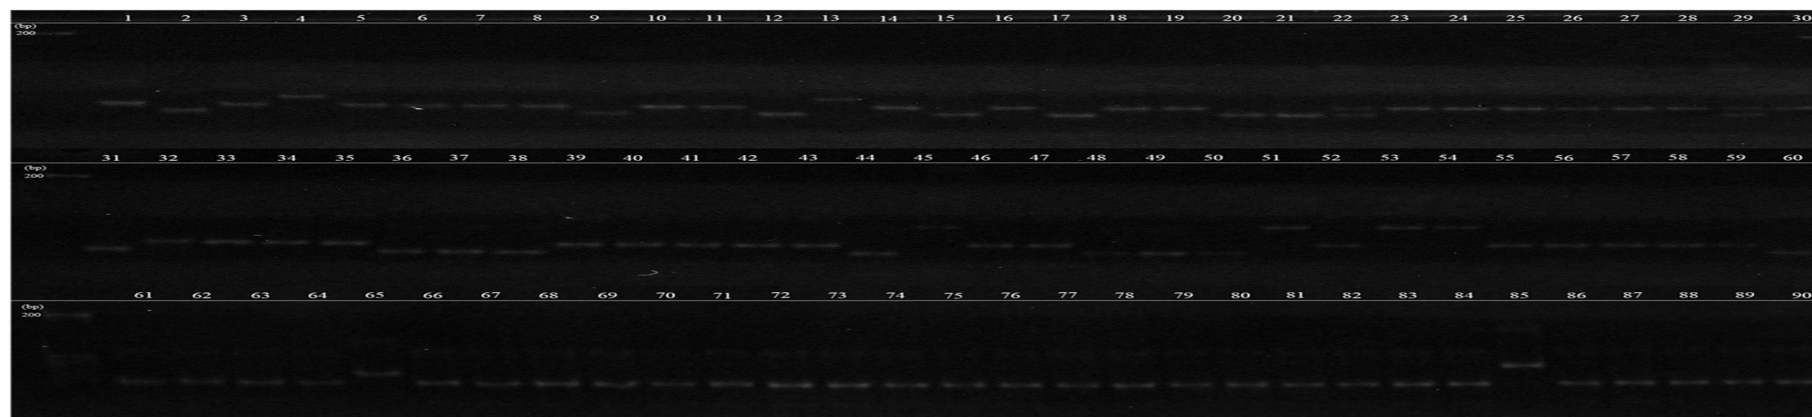

(a)

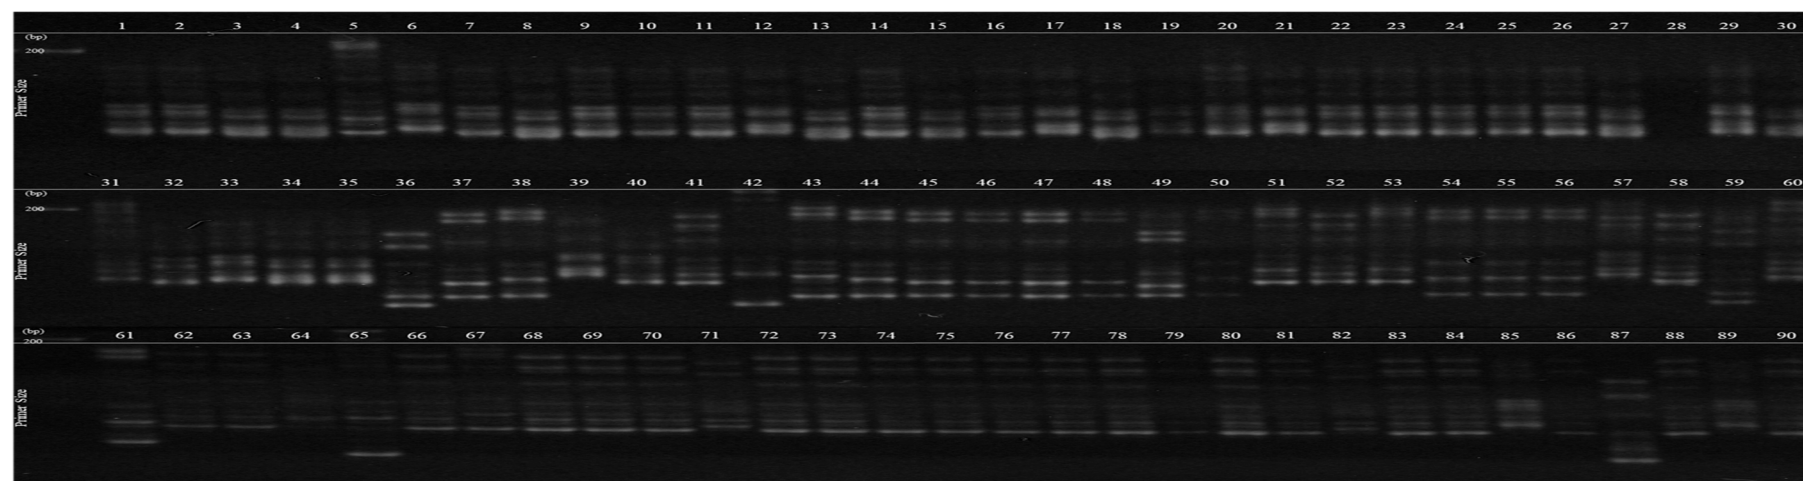

(b)

**Supplement Figure S2.** An example of an SSR profile of 90 *Perilla* accessions collected from South Korea run on 6% acrylamide nature gel, using the SSR primers KNUPF133 (a) and KNUPF141 (b).
