# Supplementary material for: Utilization of Novel Perilla SSR Markers to Assess the Genetic Diversity of Native Perilla Germplasm Accessions Collected from South Korea
Source: MDPI journal article supplement (doi:10.3390/plants11212974), 2022-11-03
Supplement: s1 [file s1]

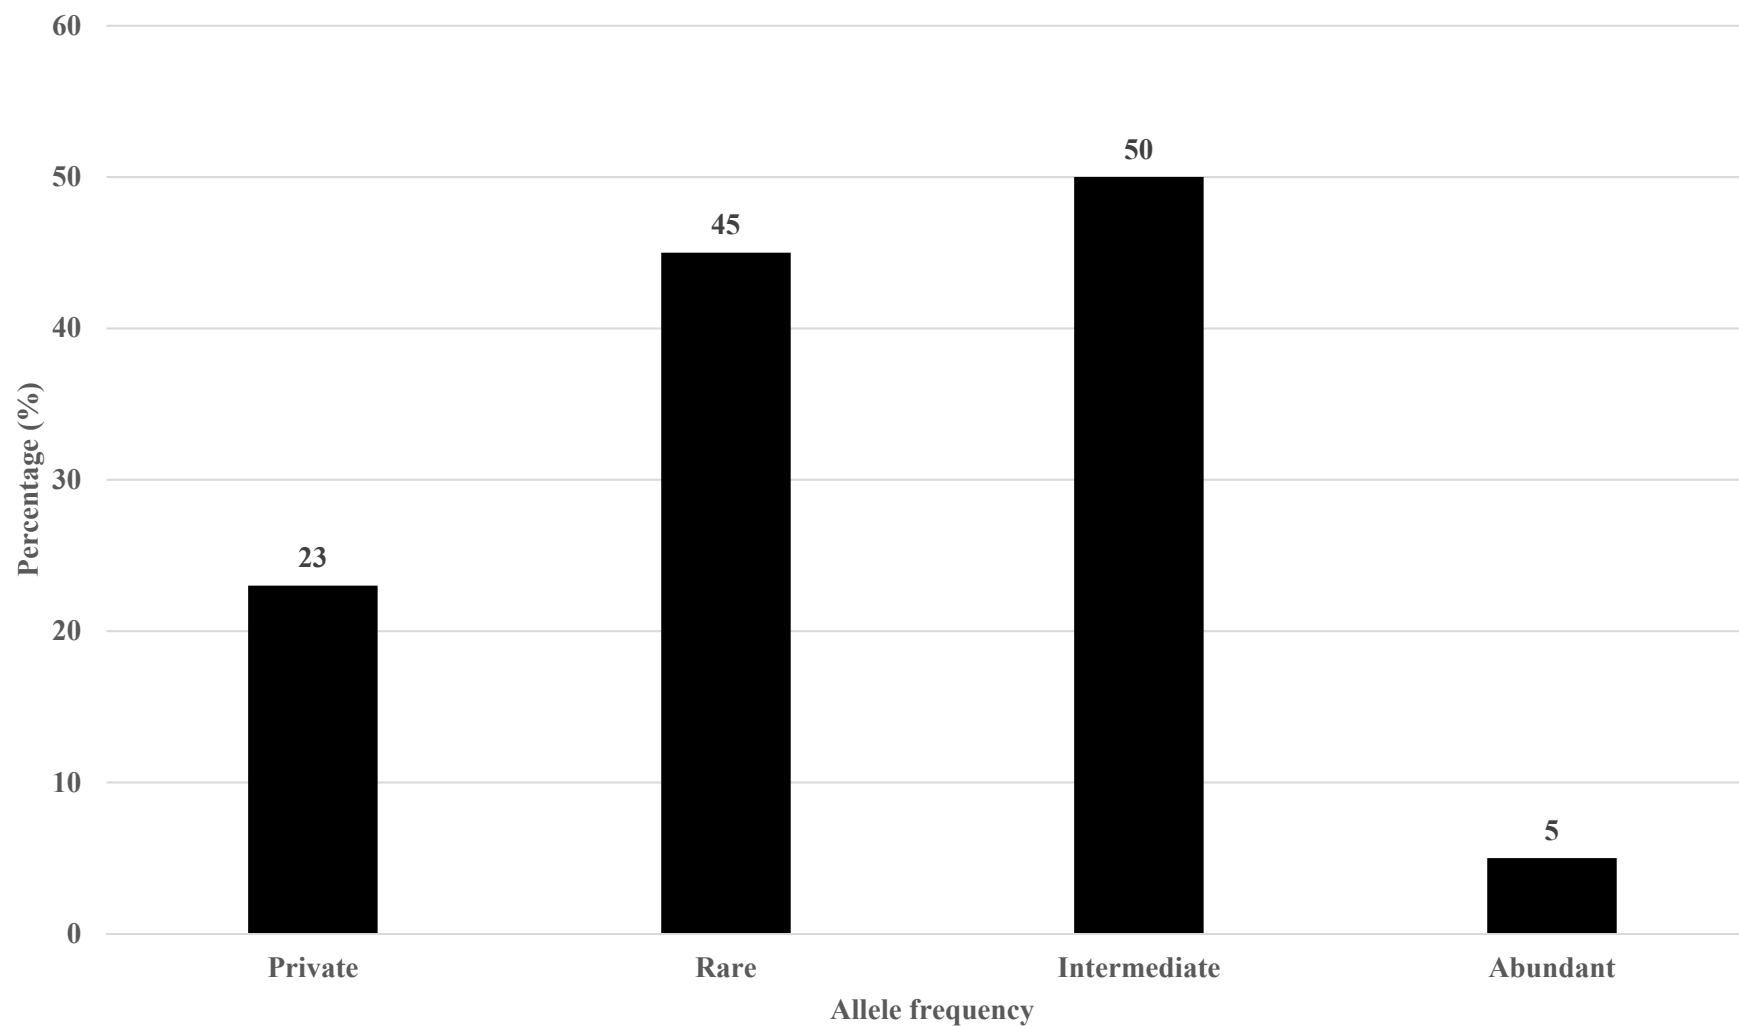

**Supplement Figure S3.** Histogram of allele frequency for a total of 100 alleles in the 90 *Perilla* accessions.
