# Supplementary material for: Utilization of Novel Perilla SSR Markers to Assess the Genetic Diversity of Native Perilla Germplasm Accessions Collected from South Korea
Source: MDPI journal article supplement (doi:10.3390/plants11212974), 2022-11-03
Supplement: s1 [file s1]

**Supplement Table S2.** *Perilla* accessions from different area of South Korea and their seed characteristics used for SSR analysis.

| Code no. | Accession no. | City and province                 | Country | Type                                      | SCC        | SS    | SH* |
|----------|---------------|-----------------------------------|---------|-------------------------------------------|------------|-------|-----|
| 1        | 103282        | Samcheok, Gangwon-do              | Korea   | Cultivated type of var. <i>frutescens</i> | Brown      | Large | S   |
| 2        | 157402        | Chuncheon-si, Gangwon-do          | Korea   | Cultivated type of var. <i>frutescens</i> | Brown      | Large | S   |
| 3        | 195496        | Yanggu-gun, Gangwon-do            | Korea   | Cultivated type of var. <i>frutescens</i> | Dark brown | Large | S   |
| 4        | 195498        | Hwacheon-si, Gangwon-do           | Korea   | Cultivated type of var. <i>frutescens</i> | Brown      | Large | S   |
| 5        | 112893        | Paju-si, Gyeonggi-do              | Korea   | Cultivated type of var. <i>frutescens</i> | Dark brown | Large | S   |
| 6        | 157559        | Suwon-si, Gyeonggi-do             | Korea   | Cultivated type of var. <i>frutescens</i> | Dark brown | Large | S   |
| 7        | 185618        | Yongin-si, Gyeonggi-do            | Korea   | Cultivated type of var. <i>frutescens</i> | Dark brown | Large | S   |
| 8        | 195351        | Yeoncheon-gun, Gyeonggi-do        | Korea   | Cultivated type of var. <i>frutescens</i> | Dark brown | Large | S   |
| 9        | 105950        | Miryang-si, Gyeongsangnam-do      | Korea   | Cultivated type of var. <i>frutescens</i> | White      | Large | S   |
| 10       | 195623        | Sangcheong-gun, Gyeongsangnam-do  | Korea   | Cultivated type of var. <i>frutescens</i> | Brown      | Large | S   |
| 11       | 208641        | Sangcheong-gun, Gyeongsangnam-do  | Korea   | Cultivated type of var. <i>frutescens</i> | Brown      | Large | S   |
| 12       | 209922        | Changnyeong-gun, Gyeongsangnam-do | Korea   | Cultivated type of var. <i>frutescens</i> | White      | Large | S   |
| 13       | 117160        | Uiseong-gun, Gyeongsangbuk-do     | Korea   | Cultivated type of var. <i>frutescens</i> | Brown      | Large | S   |
| 14       | 157495        | Uljin-gun, Gyeongsangbuk-do       | Korea   | Cultivated type of var. <i>frutescens</i> | Brown      | Large | S   |
| 15       | 185635        | Mungyeong-si, Gyeongsangbuk-do    | Korea   | Cultivated type of var. <i>frutescens</i> | Dark brown | Large | S   |
| 16       | 157529        | Gurye-gun, Jeollanam-do           | Korea   | Cultivated type of var. <i>frutescens</i> | Brown      | Large | S   |
| 17       | 216238        | Gwangyang-si, Jeollanam-do        | Korea   | Cultivated type of var. <i>frutescens</i> | White      | Large | S   |
| 18       | 216239        | Gangjin-gun, Jeollanam-do         | Korea   | Cultivated type of var. <i>frutescens</i> | Gray       | Large | S   |
| 19       | 216246        | Hampyeong-gun, Jeollanam-do       | Korea   | Cultivated type of var. <i>frutescens</i> | Brown      | Large | S   |
| 20       | 113014        | Jeongeup-si, Jeollabuk-do         | Korea   | Cultivated type of var. <i>frutescens</i> | Brown      | Large | S   |
| 21       | 157586        | Namwon-si, Jeollabuk-do           | Korea   | Cultivated type of var. <i>frutescens</i> | Dark brown | Large | S   |
| 22       | 180976        | Muju-gun, Jeollabuk-do            | Korea   | Cultivated type of var. <i>frutescens</i> | Brown      | Large | S   |
| 23       | 117136        | Nonsan-si, Chungcheongnam-do      | Korea   | Cultivated type of var. <i>frutescens</i> | Dark brown | Large | S   |
| 24       | 157578        | Asan-si, Chungcheongnam-do        | Korea   | Cultivated type of var. <i>frutescens</i> | Dark brown | Large | S   |

|    |          |                                   |       |                                           |            |       |   |
|----|----------|-----------------------------------|-------|-------------------------------------------|------------|-------|---|
| 25 | 207961   | Cheongyang-gun, Chungcheongnam-do | Korea | Cultivated type of var. <i>frutescens</i> | Brown      | Large | S |
| 26 | 207962   | Hongseong-gun, Chungcheongnam-do  | Korea | Cultivated type of var. <i>frutescens</i> | Dark brown | Large | S |
| 27 | 117127   | Cheongju-si, Chungcheongbuk-do    | Korea | Cultivated type of var. <i>frutescens</i> | Brown      | Large | S |
| 28 | 117161   | Chungju-si, Chungcheongbuk-do     | Korea | Cultivated type of var. <i>frutescens</i> | Dark brown | Large | S |
| 29 | 157512   | Eumseong-gun, Chungcheongbuk-do   | Korea | Cultivated type of var. <i>frutescens</i> | Gray       | Large | S |
| 30 | 157515   | Okcheon-gun, Chungcheongbuk-do    | Korea | Cultivated type of var. <i>frutescens</i> | Dark brown | Large | S |
| 31 | PF08-119 | Donghae-si, Gangwon-do            | Korea | Weedy type of var. <i>frutescens</i>      | Brown      | Small | H |
| 32 | PF09-042 | Yeongwol-gun, Gangwon-do          | Korea | Weedy type of var. <i>frutescens</i>      | Dark brown | Small | H |
| 33 | PF15-018 | Jeongseon-gun, Gangwon-do         | Korea | Weedy type of var. <i>frutescens</i>      | Dark brown | Small | H |
| 34 | PF08-115 | Pyeongchang-gun, Gangwon-do       | Korea | Weedy type of var. <i>frutescens</i>      | Brown      | Small | H |
| 35 | PF09-085 | Hongcheon-gun, Gangwon-do         | Korea | Weedy type of var. <i>frutescens</i>      | Dark brown | Small | S |
| 36 | PF09-005 | Hoengseong-gun, Gangwon-do        | Korea | Weedy type of var. <i>frutescens</i>      | Dark brown | Small | H |
| 37 | PF18-043 | Geochang-gun, Gyeongsangnam-do    | Korea | Weedy type of var. <i>frutescens</i>      | Dark brown | Small | H |
| 38 | PF18-052 | Hamyang-gun, Gyeongsangnam-do     | Korea | Weedy type of var. <i>frutescens</i>      | Dark brown | Small | H |
| 39 | PF14-019 | Mungyeong-si, Gyeongsangbuk-do    | Korea | Weedy type of var. <i>frutescens</i>      | Brown      | Small | H |
| 40 | PF19-007 | Andong-si, Gyeongsangbuk-do       | Korea | Weedy type of var. <i>frutescens</i>      | Brown      | Small | H |
| 41 | PF13-001 | Yeongju-si, Gyeongsangbuk-do      | Korea | Weedy type of var. <i>frutescens</i>      | Dark brown | Small | H |
| 42 | PF19-055 | Yeongcheon-si, Gyeongsangbuk-do   | Korea | Weedy type of var. <i>frutescens</i>      | Dark brown | Small | H |
| 43 | PF19-029 | Cheongsong-gun, Gyeongsangbuk-do  | Korea | Weedy type of var. <i>frutescens</i>      | Dark brown | Small | H |
| 44 | PF18-077 | Gokseong-gun, Jeollanam-do        | Korea | Weedy type of var. <i>frutescens</i>      | Dark brown | Small | H |
| 45 | PF17-053 | Damyang-gun, Jeollanam-do         | Korea | Weedy type of var. <i>frutescens</i>      | Brown      | Small | H |
| 46 | PF17-066 | Jangseong-gun, Jeollanam-do       | Korea | Weedy type of var. <i>frutescens</i>      | Brown      | Small | H |
| 47 | PF18-066 | Namwon-si, Jeollabuk-do           | Korea | Weedy type of var. <i>frutescens</i>      | Brown      | Small | H |
| 48 | PF17-027 | Sunchang-gun, Jeollabuk-do        | Korea | Weedy type of var. <i>frutescens</i>      | Dark brown | Small | H |
| 49 | PF17-001 | Wanju-gun, Jeollabuk-do           | Korea | Weedy type of var. <i>frutescens</i>      | Dark brown | Small | H |
| 50 | PF17-012 | Imsil-gun, Jeollabuk-do           | Korea | Weedy type of var. <i>frutescens</i>      | Brown      | Small | H |

|    |          |                                    |       |                                      |            |       |   |
|----|----------|------------------------------------|-------|--------------------------------------|------------|-------|---|
| 51 | PF16-143 | Jangsu-gun, Jeollabuk-do           | Korea | Weedy type of var. <i>frutescens</i> | Brown      | Small | H |
| 52 | PF18-016 | Geumsan-gun, Chungcheongnam-do     | Korea | Weedy type of var. <i>frutescens</i> | Dark brown | Small | H |
| 53 | PF15-101 | Dangjin-si, Chungcheongnam-do      | Korea | Weedy type of var. <i>frutescens</i> | Dark brown | Small | H |
| 54 | PF15-088 | Asan-si, Cheongnam-do              | Korea | Weedy type of var. <i>frutescens</i> | Dark brown | Small | H |
| 55 | PF16-019 | Yesan-gun, Chungcheongnam-do       | Korea | Weedy type of var. <i>frutescens</i> | Dark brown | Small | H |
| 56 | PF16-024 | Hongseong-gun, Chungcheongnam-do   | Korea | Weedy type of var. <i>frutescens</i> | Dark brown | Small | H |
| 57 | PF15-051 | Eumseong-gun, Chungcheongbuk-do    | Korea | Weedy type of var. <i>frutescens</i> | Dark brown | Small | H |
| 58 | PF15-060 | Jeungpyeong-gun, Chungcheongbuk-do | Korea | Weedy type of var. <i>frutescens</i> | Dark brown | Small | H |
| 59 | PF15-031 | Chungju-si, Chungcheongbuk-do      | Korea | Weedy type of var. <i>frutescens</i> | Dark brown | Small | H |
| 60 | PF14-012 | Chungju-si, Chungcheongbuk-do      | Korea | Weedy type of var. <i>frutescens</i> | Brown      | Small | H |
| 61 | PF16-033 | Hongseong-gun, Chungcheongnam-do   | Korea | Weedy type of var. <i>crispa</i>     | Dark brown | Small | H |
| 62 | PF16-042 | Boryeong-si, Chungcheongnam-do     | Korea | Weedy type of var. <i>crispa</i>     | Dark brown | Small | H |
| 63 | PF16-102 | Gumi-si, Gyeongsangbuk-do          | Korea | Weedy type of var. <i>crispa</i>     | Dark brown | Small | H |
| 64 | PF16-108 | Gimcheon-si, Gyeongsangbuk-do      | Korea | Weedy type of var. <i>crispa</i>     | Dark brown | Small | H |
| 65 | PF16-112 | Gimcheon-si, Gyeongsangbuk-do      | Korea | Weedy type of var. <i>crispa</i>     | Dark brown | Small | H |
| 66 | PF16-123 | Muju-gun, Jeollabuk-do             | Korea | Weedy type of var. <i>crispa</i>     | Dark brown | Small | H |
| 67 | PF16-126 | Muju-gun, Jeollabuk-do             | Korea | Weedy type of var. <i>crispa</i>     | Dark brown | Small | H |
| 68 | PF16-146 | Jangsu-gun, Jeollabuk-do           | Korea | Weedy type of var. <i>crispa</i>     | Dark brown | Small | H |
| 69 | PF17-002 | Wanju-gun, Jeollabuk-do            | Korea | Weedy type of var. <i>crispa</i>     | Dark brown | Small | H |
| 70 | PF17-017 | Imsil-gun, Jeollabuk-do            | Korea | Weedy type of var. <i>crispa</i>     | Brown      | Small | H |
| 71 | PF17-025 | Sunchang-gun, Jeollabuk-do         | Korea | Weedy type of var. <i>crispa</i>     | Dark brown | Small | H |
| 72 | PF17-039 | Sunchang-gun, Jeollabuk-do         | Korea | Weedy type of var. <i>crispa</i>     | Dark brown | Small | H |
| 73 | PF17-054 | Damyang-gun, Jeollanam-do          | Korea | Weedy type of var. <i>crispa</i>     | Dark brown | Small | H |
| 74 | PF17-062 | Jangseong-gun, Jeollanam-do        | Korea | Weedy type of var. <i>crispa</i>     | Dark brown | Small | H |
| 75 | PF17-068 | Jangseong-gun, Jeollanam-do        | Korea | Weedy type of var. <i>crispa</i>     | Dark brown | Small | H |
| 76 | PF18-006 | Geumsan-gun, Chungcheongnam-do     | Korea | Weedy type of var. <i>crispa</i>     | Dark brown | Small | H |

|    |          |                                 |       |                                  |            |       |   |
|----|----------|---------------------------------|-------|----------------------------------|------------|-------|---|
| 77 | PF18-007 | Geumsan-gun, Chungcheongnam-do  | Korea | Weedy type of var. <i>crispa</i> | Dark brown | Small | H |
| 78 | PF18-011 | Geumsan-gun, Chungcheongnam-do  | Korea | Weedy type of var. <i>crispa</i> | Dark brown | Small | H |
| 79 | PF18-012 | Geumsan-gun, Chungcheongnam-do  | Korea | Weedy type of var. <i>crispa</i> | Dark brown | Small | H |
| 80 | PF18-014 | Geumsan-gun, Chungcheongnam-do  | Korea | Weedy type of var. <i>crispa</i> | Brown      | Small | H |
| 81 | PF18-033 | Gimcheon-si, Gyeongsangbuk-do   | Korea | Weedy type of var. <i>crispa</i> | Dark brown | Small | H |
| 82 | PF18-038 | Geochang-gun, Gyeongsangnam-do  | Korea | Weedy type of var. <i>crispa</i> | Dark brown | Small | H |
| 83 | PF18-065 | Namwon-si, Jeollabuk-do         | Korea | Weedy type of var. <i>crispa</i> | Dark brown | Small | H |
| 84 | PF19-001 | Andong-si, Gyeongsangbuk-do     | Korea | Weedy type of var. <i>crispa</i> | Dark brown | Small | H |
| 85 | PF19-012 | Andong-si, Gyeongsangbuk-do     | Korea | Weedy type of var. <i>crispa</i> | Brown      | Small | H |
| 86 | PF19-013 | Andong-si, Gyeongsangbuk-do     | Korea | Weedy type of var. <i>crispa</i> | Brown      | Small | H |
| 87 | PF19-035 | Pohang-si, Gyeongsangbuk-do     | Korea | Weedy type of var. <i>crispa</i> | Brown      | Small | H |
| 88 | PF19-045 | Yeongcheon-si, Gyeongsangbuk-do | Korea | Weedy type of var. <i>crispa</i> | Brown      | Small | H |
| 89 | PF19-050 | Yeongcheon-si, Gyeongsangbuk-do | Korea | Weedy type of var. <i>crispa</i> | Mixed      | Small | H |
| 90 | PF19-054 | Yeongcheon-si, Gyeongsangbuk-do | Korea | Weedy type of var. <i>crispa</i> | Brown      | Small | H |

\*Seed hardness: S—Soft, H—Hard
