# Supplementary material for: Utilization of Novel Perilla SSR Markers to Assess the Genetic Diversity of Native Perilla Germplasm Accessions Collected from South Korea
Source: MDPI journal article supplement (doi:10.3390/plants11212974), 2022-11-03
Supplement: s1 [file s1]

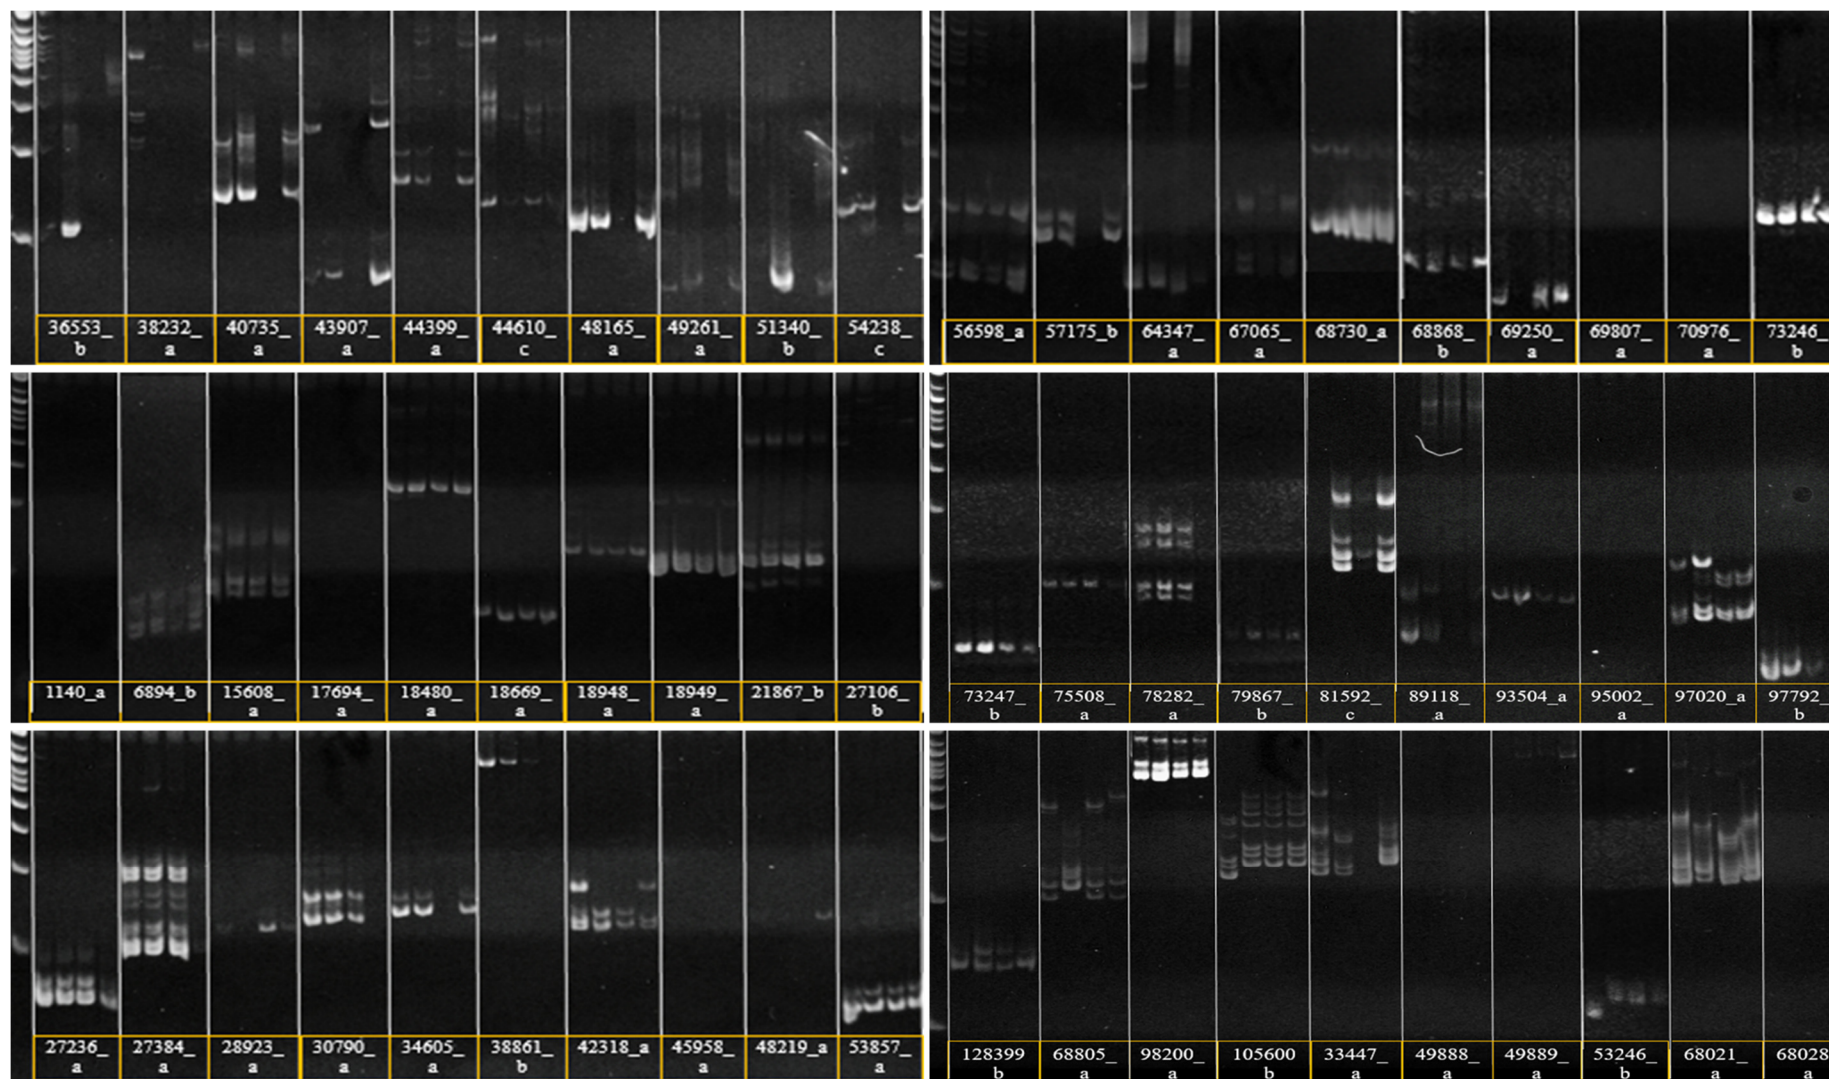

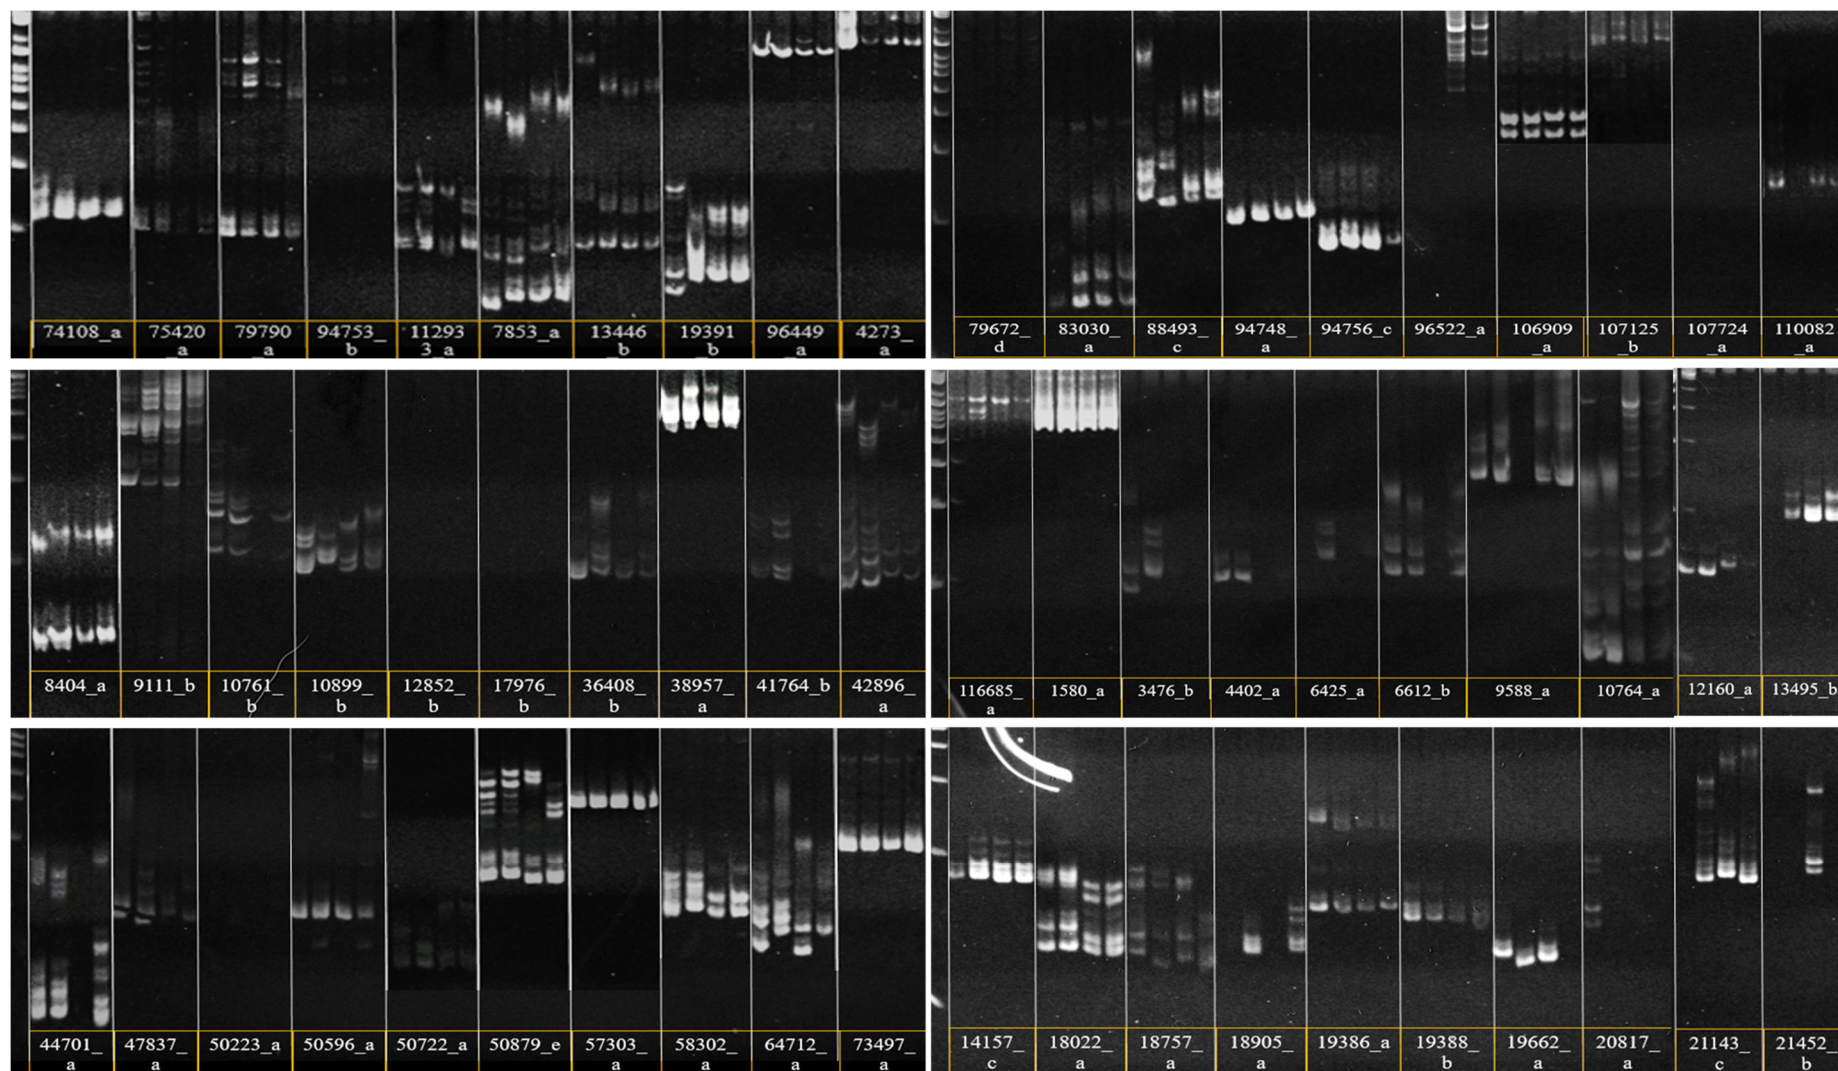

**Supplement Figure S1.** An example of an SSR profile of four accessions of cultivated and weedy types *Perilla* crop (the order is cultivated var. *frutescens*, weedy var. *frutescens*, cultivated var. *crispa*, weedy var. *crispa*) using 200 newly developed SSR primer sets. The two pictures are examples of SSR profiles for 120 of 200 primer sets.
